# Supplementary material for: Glucokinase Inactivation Ameliorates Lipid Accumulation and Exerts Favorable Effects on Lipid Metabolism in Hepatocytes
Source: MDPI journal article supplement (doi:10.3390/ijms24054315), 2023-02-21
Supplement: s1 [file s1]

## Supplemental

### Supplementary Table

**Table S1. The full names and corresponding abbreviations of lipids.**

| Abbreviation | Full name of lipids                                             |
|--------------|-----------------------------------------------------------------|
| ACar         | Acylcarnitine                                                   |
| BMP          | Bismonoacylglycerophosphate                                     |
| CE           | Cholesteryl ester                                               |
| Cer          | ceramides                                                       |
| Cer-ADS      | Ceramide alpha-hydroxy fatty acid-dihydrosphingosine            |
| Cer-AP       | Ceramide alpha-hydroxy fatty acid-phytospingosine               |
| Cer-AS       | Ceramide alpha-hydroxy fatty acid-sphingosine                   |
| Cer-BDS      | Ceramide beta-hydroxy fatty acid-dihydrosphingosine             |
| Cer-BS       | Ceramide beta-hydroxy fatty acid-sphingosine                    |
| Cer-EODS     | Ceramide Esterified omega-hydroxy fatty acid-dihydrosphingosine |
| Cer-EOS      | Ceramide Esterified omega-hydroxy fatty acid-sphingosine        |
| Cer-NDS      | Ceramide non-hydroxyfatty acid-dihydrosphingosine               |
| Cer-NP       | Ceramide non-hydroxyfatty acid-phytospingosine                  |
| Cer-NS       | Ceramide non-hydroxyfatty acid-sphingosine                      |
| CL           | Cardiolipin                                                     |
| DAG          | Diacylglycerol                                                  |
| DGDG         | Digalactosyldiacylglycerol                                      |
| DGTS         | Diacylglyceryl trimethylhomoserine                              |
| FA           | Free fatty acid                                                 |
| FAHFA        | Fatty acid ester of hydroxyl fatty acid                         |
| GlcADG       | glucuronosyldiacylglycerol                                      |
| GM3          | Ganglioside                                                     |
| HBMP         | Hemibismonoacylglycerophosphate                                 |
| HexCer-AP    | Hexosylceramide alpha-hydroxy fatty acid-phytospingosine        |
| HexCer-NDS   | Hexosylceramide non-hydroxyfatty acid-dihydrosphingosine        |
| HexCer-NS    | Hexosylceramide non-hydroxyfatty acid-sphingosine               |
| LDGTS        | Lysodiacylglyceryl trimethylhomoserine                          |
| LPA          | Lysophosphatidic acid                                           |
| LPC          | Lysophosphatidylcholine                                         |
| LPE          | Lysophosphatidylethanolamine                                    |

---

|         |                                         |
|---------|-----------------------------------------|
| LPG     | Lysophosphatidylglycerol                |
| LPI     | Lysophosphatidylinositol                |
| LPS     | Lysophosphatidylserine                  |
| MAG     | Monoacylglycerol                        |
| MGDG    | Monogalactosyldiacylglycerol            |
| OxPC    | Oxidized phosphatidylcholine            |
| OxPE    | Oxidized phosphatidylethanolamine       |
| OxPG    | Oxidized phosphatidylglycerol           |
| OxPI    | Oxidized phosphatidylinositol           |
| OxPS    | Oxidized phosphatidylserine             |
| PA      | Phosphatidic acid                       |
| PC      | Phosphatidylcholine                     |
| PE      | Phosphatidylethanolamine                |
| PEtOH   | Phosphatidylethanol                     |
| PG      | Phosphatidylglycerol                    |
| PI      | Phosphatidylinositol                    |
| PMeOH   | Phosphatidylmethanol                    |
| PS      | Phosphatidylserine                      |
| SHexCer | SulfurHexosylceramide hydroxyfatty acid |
| SM      | Sphingomyelin                           |
| SQDG    | Sulfoquinovosyl diacylglycerol          |
| TAG     | triacylglycerol                         |

---

## Supplementary Figure

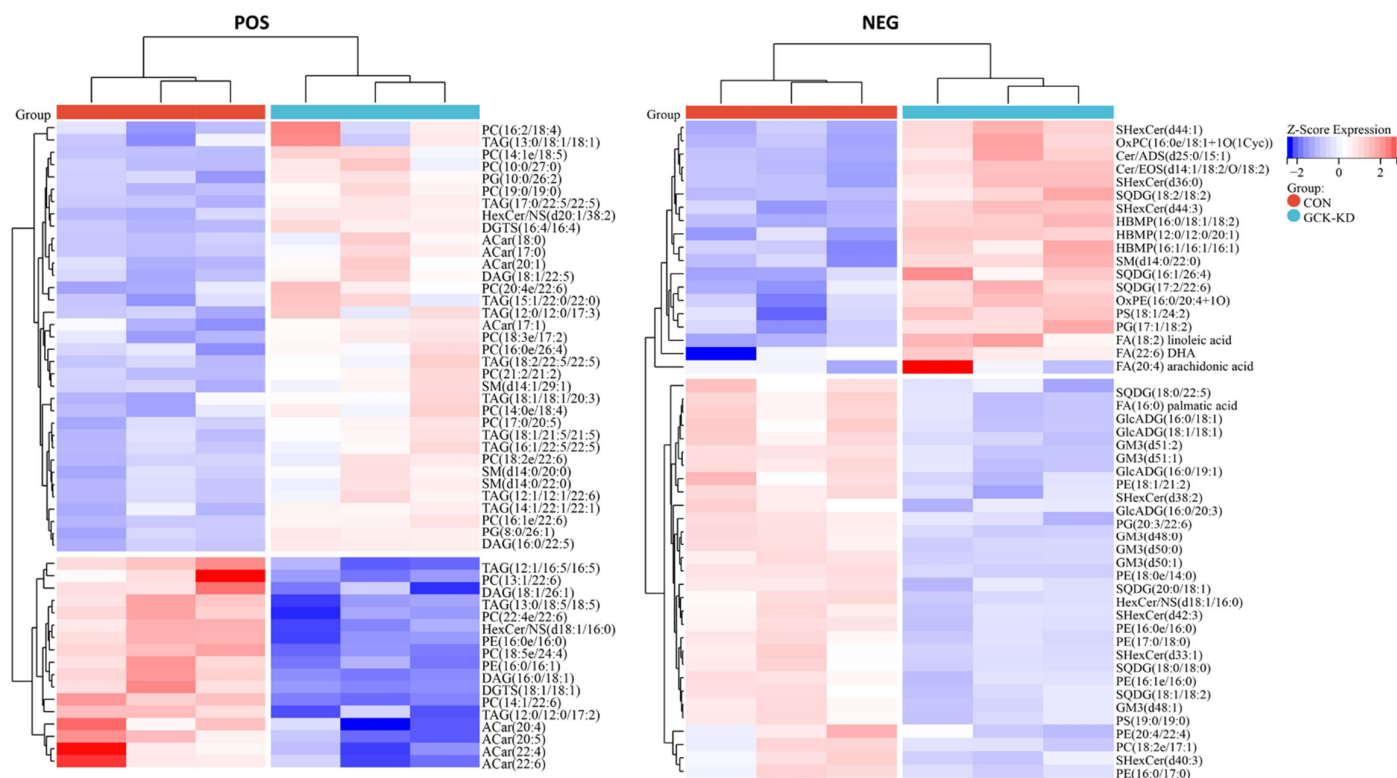

**Figure S1. Heatmap of hierarchical clustering analysis for lipids in positive and negative mode.** The color intensity presents the corresponding abundance difference. Blue indicates decreasing expression, and red indicates increasing expression. The heatmaps suggested that differential lipids could be clustered into two patterns in positive and negative modes, enriched in GCK-knockdown or control groups.

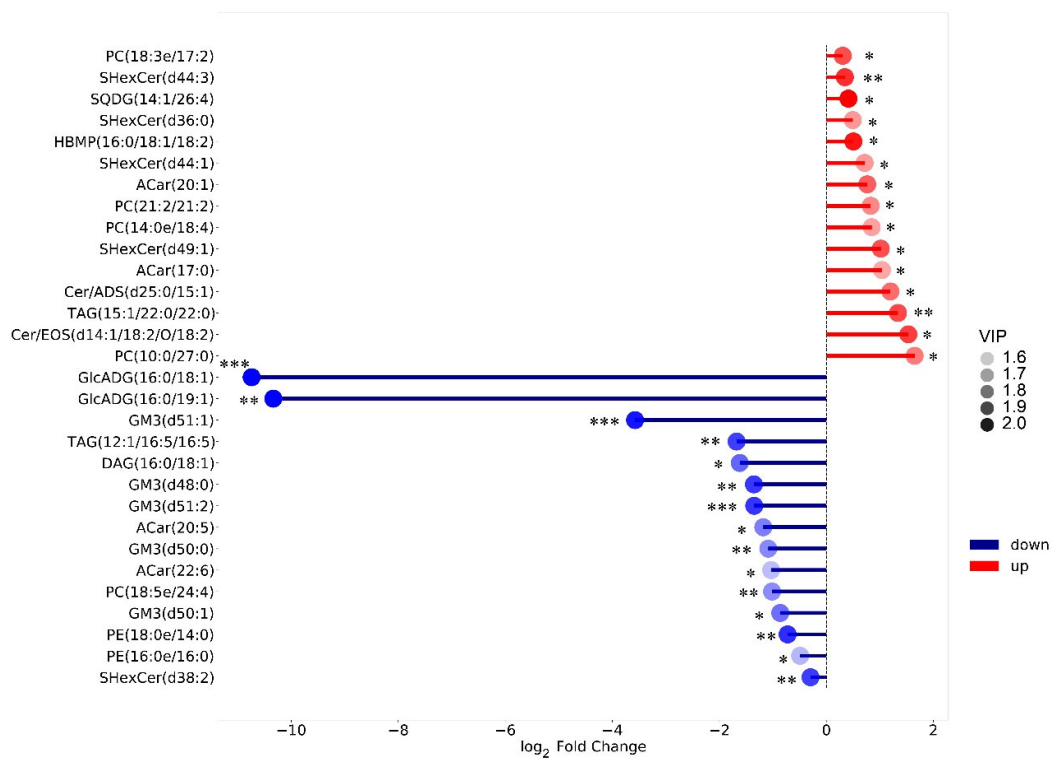

**Figure S2. Matchstick analysis for differentially expressed lipids.** The X-axis displays the log fold change of each lipid; the shade of dot color represents the VIP value. \*\*\*  $p \leq 0.001$ , \*\*  $p \leq 0.01$ , \*  $p \leq 0.05$  versus control group via Student's t-test.

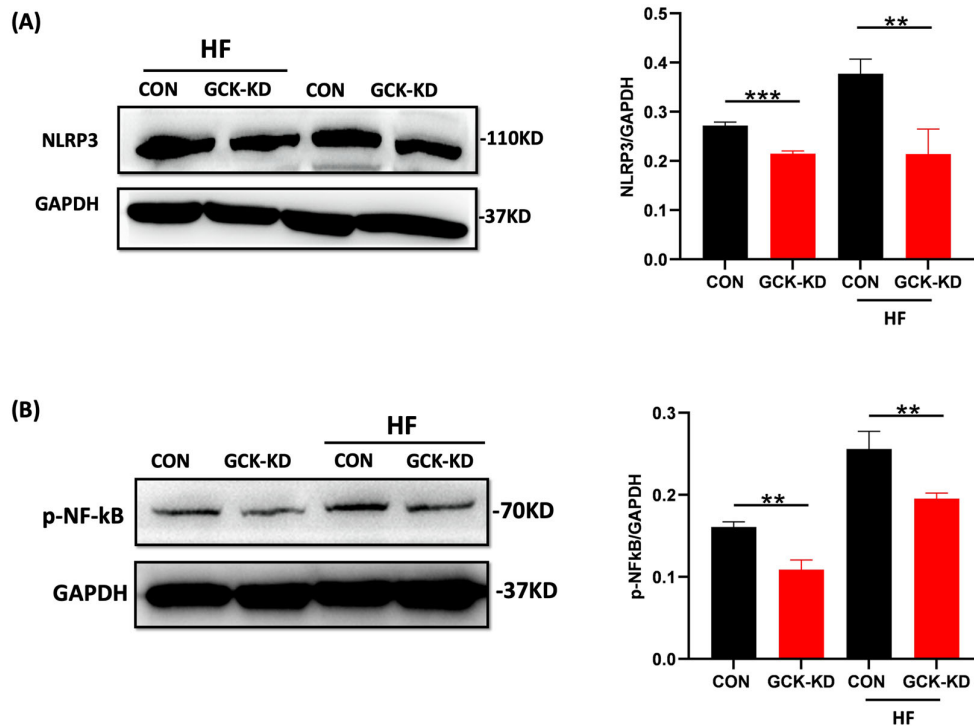

**Figure S3. GCK knockdown impacts the expression of proteins involved in inflammation in HepG2 cells.** (A) and (B) Relative expression of NLRP3 and p-NF-kB proteins in GCK-knockdown HepG2 cells under normal and high fatty acid (HFA) conditions. Data are represented as mean  $\pm$  SD. \*\*\*  $p \leq 0.001$ , \*\*  $p \leq 0.01$  versus control group via Student's  $t$ -test.
